# Supplementary material
Source: PubMed Central journal article supplement (PMC9974158)
Supplement: NIHMS1825134-supplement-Supp__Table_1.pdf [file NIHMS1825134-supplement-Supp__Table_1.pdf]

**Supplementary Table 1. m6A peaks on CD155 mRNA from Me-RIP-sequence**

| <b>Position</b>            | <b>Length</b> | <b>Region</b> | <b>Cell type</b>  |
|----------------------------|---------------|---------------|-------------------|
| chr19:44661317-44662104[+] | 371           | cds utr3      | MONOMAC-6, NOMO-1 |
| chr19:44661743-44661974[+] | 231           | cds utr3      | MONOMAC-6         |
| chr19:44661743-44662104[+] | 361           | cds utr3      | MONOMAC-6         |
| chr19:44661753-44661984[+] | 231           | cds utr3      | NOMO-1            |
| chr19:44661753-44662114[+] | 361           | cds utr3      | MONOMAC-6         |
| chr19:44661993-44662084[+] | 91            | utr3          | MONOMAC-6         |
| chr19:44662882-44663463[+] | 581           | utr3          | MONOMAC-6         |
| chr19:44662892-44663463[+] | 571           | utr3          | MONOMAC-6         |
| chr19:44662942-44663083[+] | 141           | utr3          | MONOMAC-6         |
| chr19:44662972-44663153[+] | 181           | utr3          | NOMO-1            |
