# Supplementary material
Source: PubMed Central journal article supplement (PMC9974158)
Supplement: NIHMS1825134-supplement-Supp__Table_2.pdf [file NIHMS1825134-supplement-Supp__Table_2.pdf]

**Supplementary Table 2. Reagent list**

| <b>Reagent</b>                                     | <b>Source</b> | <b>Identifier</b>                    |
|----------------------------------------------------|---------------|--------------------------------------|
| <b>Antibodies</b>                                  |               |                                      |
| Brilliant Violet 785™ anti-human<br>CD154          | BioLegend     | Cat#310842,RRID:AB_2572187<br>1:100  |
| Brilliant Violet 510™ anti-human<br>CD69 Antibody  | BioLegend     | Cat#310936,RRID:AB_2563834<br>1:100  |
| Brilliant Violet 421™ anti-human<br>CD3 Antibody   | BioLegend     | Cat#344834,RRID:AB_2565675<br>1:100  |
| PE/Cyanine7 anti-human CD4<br>Antibody             | BioLegend     | Cat#357410,RRID:AB_2565662<br>1:100  |
| Brilliant Violet 650™ anti-human<br>CD8 Antibody   | BioLegend     | Cat#344730,RRID:AB_2564510<br>1:100  |
| APC/Cyanine7 anti-human CD45RA<br>Antibody         | BioLegend     | Cat#304128,RRID:AB_10708880<br>1:100 |
| FITC anti-human CD45RO Antibody                    | BioLegend     | Cat#304242,RRID:AB_2564159<br>1:100  |
| PerCP/Cyanine5.5 anti-human CD38<br>Antibody       | BioLegend     | Cat#356614,RRID:AB_2562183<br>1:100  |
| Brilliant Violet 711™ anti-human<br>CD163 Antibody | BioLegend     | Cat#333630,RRID:AB_2650972<br>1:100  |
| PE/Cyanine7 anti-human CD45<br>Antibody            | BioLegend     | Cat#368532,RRID:AB_2715892<br>1:100  |

|                                               |                           |                                                                 |
|-----------------------------------------------|---------------------------|-----------------------------------------------------------------|
| Brilliant Violet 711™ anti-human CD4 Antibody | BioLegend                 | Cat#317439,RRID:AB_11219404<br>1:100                            |
| Pacific Blue™ anti-human HLA-DR Antibody      | BioLegend                 | Cat#307624, RRID:AB_493665<br>1:100                             |
| APC anti-human CD206 (MMR) Antibody           | BioLegend                 | Cat#321110, RRID:AB_571885<br>1:100                             |
| PE anti-human CD155 (PVR) Antibody            | BioLegend                 | Cat# 337610, RRID:AB_2174019<br>1:100                           |
| Biotin Anti-Human CD154                       | BioLegend                 | Cat#317439,RRID:AB_492966<br>1:100                              |
| CD40 Monoclonal Antibody (5C3), eBioscience™  | Thermo Fisher Scientific  | Cat#14-0409-82,RRID:AB_467232<br>1µg/ml                         |
| CD155 Monoclonal Antibody (D171)              | Thermo Fisher Scientific  | Cat#MA5-13493,<br>RRID:AB_10978147 1:200                        |
| CD68 Monoclonal Antibody (KP1)                | Thermo Fisher Scientific  | Cat#MA5-13324,<br>RRID:AB_10987212. 1:200                       |
| CD96 Polyclonal Antibody                      | Thermo Fisher Scientific  | Cat#PA5-97568, RRID:AB_2812183<br>1:100                         |
| TIGIT (E5Y1W) XP® Rabbit mAb                  | Cell Signaling Technology | Cat#99567S<br>1:100                                             |
| METTL3 (E3F2A) Rabbit mAb                     | Cell Signaling Technology | Cat#86132S, RRID:AB_2800072<br>1:500 (WB); 1:80(Flow);1:200(IF) |
| Goat anti-rabbit IgG (H+L), Alexa Fluor 488   | Thermo Fisher Scientific  | Cat#A-11008, RRID:AB_143165<br>1:200                            |

|                                                                                     |                           |                                       |
|-------------------------------------------------------------------------------------|---------------------------|---------------------------------------|
| Goat anti-mouse IgG (H+L), Alexa Fluor 594                                          | Thermo Fisher Scientific  | Cat#A-11032, RRID:AB_2534091<br>1:200 |
| Goat anti-Rabbit IgG (H+L)<br>Secondary Antibody, FITC                              | Thermo Fisher Scientific  | Cat#A-31635, RRID:AB_429708<br>1:200  |
| Mouse monoclonal anti- $\beta$ -Actin                                               | Cell Signaling Technology | Cat#3700S, RRID:AB_2242334<br>1:5000  |
| <b>Proteins</b>                                                                     |                           |                                       |
| SARS-CoV-2 (2019-nCoV)<br>Nucleocapsid-His recombinant<br>Protein                   | Sino Biological           | Cat#:40588-V08B-100                   |
| SARS-CoV-2 (2019-nCoV) Spike<br>S1+S2 ECD-His                                       | Sino Biological           | Cat#:40589-V08H4-100                  |
| Epstein-Barr virus (Herpesvirus 4)<br>EBV Glycoprotein gp350 / EBV<br>GP350 Protein | Sino Biological           | Cat#:40373-V08B                       |
| <b>Plamid</b>                                                                       |                           |                                       |
| pMIR-REPORT™ miRNA<br>Expression Reporter Vector System                             | Thermo Fisher Scientific  | Cat#: AM5795                          |
| <b>Oligo and DNA</b>                                                                |                           |                                       |
| CD155 siRNA                                                                         | Santa Cruz Biotechnology  | Cat#:sc-61903                         |
| METTL3 siRNA                                                                        | Santa Cruz Biotechnology  | Cat#: sc-92172                        |
| METTL3 cDNA ORF clone, Homo sapiens (human)                                         | GenScript                 | OHu70047                              |
| <b>Chemicals</b>                                                                    |                           |                                       |
| Lymphoprep                                                                          | Cosmo Bio                 | Cat#AXS-1115758                       |

|                                                         |                           |                       |
|---------------------------------------------------------|---------------------------|-----------------------|
| Anti-CD3/CD28 beads                                     | Life Technologies         | Cat#11132D            |
| Brefeldin A Solution                                    | BioLegend                 | Cat#420601            |
| DAPI                                                    | Cayman                    | Cat#14285             |
| RPMI 1640 Medium                                        | Thermo Fisher Scientific  | Cat#11875135          |
| 4-15% SDS-PAGE                                          | Bio-Rad                   | Cat#4561083           |
| PVDF membranes                                          | Bio-Rad                   | Cat#1620177           |
| TBST                                                    | Cell Signaling Technology | Cat#9997S             |
| PBS                                                     | Boston BioProducts        | Cat#BM-220            |
| Tris-Glycine-SDS Running Buffer<br>(10X)                | Boston BioProducts        | Cat#NBP-150           |
| Tris-Glycine Transfer Buffer (10X)                      | Cell Signaling Technology | Cat#12539S            |
| SuperSignal West Femto Maximum<br>Sensitivity Substrate | Thermo Fisher Scientific  | Cat#34094             |
| Direct-zol RNA MiniPrep                                 | Genesee Scientific        | Cat#11-331            |
| High-Capacity cDNA Reverse<br>Transcription Kit         | Thermo Fisher Scientific  | Cat#4368813           |
| 2x SYBR Green qPCR Master Mix                           | Bimake                    | Cat#B21203            |
| Actinomycin D, from Streptomyces<br>sp., ~98% (HPLC)    | Sigma-Aldrich             | Cat#A1410-2MG         |
| 3-Deazaadenosine                                        | Sigma-Aldrich             | Cat#D8296-5MG         |
| ox-LDL                                                  | Thermo Fisher Scientific  | Cat#L34357, 50µg/ml   |
| LDL, human                                              | Sigma-Aldrich             | Cat#LP2-2MG, 100µg/ml |
| Uric Acid                                               | Sigma-Aldrich             | Cat# U0881-10G, 10mM  |
| β-glucan                                                | EMD Millipore             | Cat#346210-25MG, 1µM  |

|                                                      |                          |                      |
|------------------------------------------------------|--------------------------|----------------------|
| Recombinant Human HMGB1 (carrier-free) 25 µg         | Biolegend                | Cat#557804, 100ng/ml |
| Palmitic acid                                        | Sigma-Aldrich            | Cat#P0500-10G,0.5mM  |
| Lipoic acid                                          | Sigma-Aldrich            | Cat#T1395-1G,1mM     |
| Glucose Solution                                     | Thermo Fisher Scientific | Cat#A249400, 50mM    |
| Bst DNA Polymerase, Large Fragment                   | New England Biolabs      | Cat#M0275S           |
| M-MLV Reverse Transcriptase                          | Thermo Fisher Scientific | Cat# 28025013        |
| NEBNext® High-Fidelity 2X PCR Master Mix             | New England Biolabs      | Cat#M0541S           |
| ClonExpress II One Step Cloning Kit                  | Cellagen Technology      | Cat#C112-02          |
| One Shot TOP10 Chemically Competent E. coli (TOP 10) | Thermo Fisher Scientific | Cat#C404003          |
| T4 DNA Ligase                                        | New England Biolabs      | Cat# M0202S          |
| <b>Assay</b>                                         |                          |                      |
| IFNγ High Sensitivity Human ELISA Kit (ab46048)      | Abcam                    | Cat#ab46048          |
| EpiQuik CUT&RUN m6A RNA Enrichment (MeRIP) Kit       | Epigentek                | Cat#P-9018-24        |
| EasySep™ Human Monocyte Isolation Kit                | STEMCELL Technologies    | Cat#19359            |
| EasySep™ Human Biotin Positive Selection Kit II      | STEMCELL Technologies    | Cat#17663            |
| EasySep™ Human Naïve CD4+ T Cell Isolation Kit II    | STEMCELL Technologies    | Cat#17555            |

|                                                     |                       |                                                                                                                       |
|-----------------------------------------------------|-----------------------|-----------------------------------------------------------------------------------------------------------------------|
| EasySep™ Human Memory CD4+ T<br>Cell Enrichment Kit | STEMCELL Technologies | Cat#19157                                                                                                             |
| Dual-Luciferase® Reporter Assay<br>System           | Promega               | Cat#E1910                                                                                                             |
| <b>Software</b>                                     |                       |                                                                                                                       |
| Flowjo                                              | BD                    | <a href="https://www.flowjo.com/">https://www.flowjo.com/</a>                                                         |
| ImageJ                                              | NIH                   | <a href="https://imagej.nih.gov/ij/">https://imagej.nih.gov/ij/</a>                                                   |
| GraphPad Prism                                      | GraphPad Software     | <a href="https://www.graphpad.com/scientific-software/prism/">https://www.graphpad.com/scientific-software/prism/</a> |
