# Supplementary material
Source: PubMed Central journal article supplement (PMC9974158)
Supplement: NIHMS1825134-supplement-Supp__Table_3.pdf [file NIHMS1825134-supplement-Supp__Table_3.pdf]

**Supplementary Table 3. Primer list for RT-PCR**

| <b>gene</b> | <b>Forward</b>           | <b>Reverse</b>          |
|-------------|--------------------------|-------------------------|
| CD155       | TGGAGGTGACGCATGTGTC      | GTTTGGACTCCGAATAGCTGG   |
| IDO1        | GCCAGCTTCGAGAAAGAGTTG    | ATCCCAGAACTAGACGTGCAA   |
| IDO2        | CCACAGACCGAATGTGAAGAC    | TGTTGGCAATTTCCATCCAAGG  |
| TIM1        | TGTCTGGACCAATGGAACCC     | GGCAACAATATACGCCACTGT   |
| TIM4        | ATTGAGTTTTGGTGGCTTTACCT  | GAGTAGGGGCACTGGTCTTTC   |
| CD40        | ACATACAACCAAACCTTCTCCCCG | GCAAAAAGTGCTGACCCAATCA  |
| CD80        | AAACTCGCATCTACTGGCAA     | GGTTCTTGTACTCGGGCCATA   |
| CD86        | CTGCTCATCTATACACGGTTACC  | GGAAACGTCGTACAGTTCTGTG  |
| PD-L1       | TGGCATTGCTGAACGCATTT     | TGCAGCCAGGTCTAATTGTTTT  |
| TNFSF14     | GTGCAGTCCAGGTTATCGTGT    | CACTTGCTTAGGCCATTGAGG   |
| CD112       | GGATGTGCGAGTTCAAGTGCT    | TGGGACCCATCTTAGGGTGG    |
| CD113       | GCAGTTCACCATCCCCAATATG   | TCCAAGCGGGAATGTAACAGC   |
| TIGIT       | TGGTCGCGTTGACTAGAAAGA    | GGGCTCCATTCCTCCTGTC     |
| CD96        | CAAACACAGACAGTAGGCTTCTT  | GGGGATGATAGACAGCAATCAG  |
| CD226       | GTGGAGTGGTTCAAGATCGGG    | GCTTCCTTATGACCATGCCAT   |
| METTL3      | TTGTCTCCAACCTTCCGTAGT    | CCAGATCAGAGAGGTGGTGTAG  |
| METTL14     | AGTGCCGACAGCATTGGTG      | GGAGCAGAGGTATCATAGGAAGC |
| WTAP        | CTTCCCAAGAAGGTTGATTGA    | TCAGACTCTCTTAGGCCAGTTAC |
| IGFBP1      | GCGGCCAGTTCTTGGTCAA      | TTGGGCACCGAATGTTCAATC   |
| IGFBP3      | TATATCGGAAACCTCAGCGAGA   | GGACCGAGTGCTCAACTTCT    |
| YTHDF1      | ACCTGTCCAGCTATTACCCG     | TGGTGAGGTATGGAATCGGAG   |
| YTHDF2      | AGCCCCACTTCTACCAGATG     | TGAGAACTGTTATTTCCCATGC  |

|                     |                                                 |                                                  |
|---------------------|-------------------------------------------------|--------------------------------------------------|
| TYHDF3              | TCAGAGTAACAGCTATCCACCA                          | GGTTGTCAGATATGGCATAGGCT                          |
| YTHDC1              | AACTGGTTTCTAAGCCACTGAGC                         | GGAGGCACTACTTGATAGACGA                           |
| YTHDC2              | AGGACATTCGCATTGATGAGG                           | CTCTGGTCCCCGTATCGGA                              |
| FTO                 | ACTTGGCTCCCTTATCTGACC                           | TGTGCAGTGTGAGAAAGGCTT                            |
| ALKBH5              | CGGCGAAGGCTACACTTACG                            | CCACCAGCTTTTGGATCACCA                            |
| CD155<br>construct1 | AGCTGCGCACTAGTGAGGCAGCGTC<br>GGGACTGAGAGGGGAGAG | AAATAAAAGATCCTTTATTGTACTC<br>TAGTCTGCCAACAGAGCCA |
| CD155<br>construct2 | AGCTGCGCACTAGTGAGGGCTGCAG<br>TTGCTCAGGACACGC    | AAATAAAAGATCCTTTATTTGTCTG<br>CTCCTTGATTTCCACA    |
| 1635mut             | CATTTGCTAGAAGGCCTCACTAGAC<br>TCAGGA             | TCCTGAGTCTAGTGAGGCCTTCTAG<br>CAAATG              |
| 3130mut             | AGGAGGCCAGTGGGCCCCACAGAG<br>TTGGG               | CCCAACTCTGTGGGGGCCCACTGGC<br>CTCCT               |
| CD155<br>m6A RT     | GCTCCGAGTGCTTGCCAAGCCC                          | AGACCTGGGCGGGATGCCCAA                            |
