# Supplementary material
Source: PubMed Central journal article supplement (PMC9974158)
Supplement: NIHMS1825134-supplement-Supp__Table_4.pdf [file NIHMS1825134-supplement-Supp__Table_4.pdf]

**Supplementary Table 4. Primer list for retro-transcription at m6A sites**

|          |                       |
|----------|-----------------------|
| 1452 RT- | CAGAGAGAACAGCTCTTCCC  |
| 1452 RT+ | GAGGGGAGAGAGACTGGAGCT |
| 1469 RT- | CAGAGAGAACAGCTCTTCCC  |
| 1469 RT+ | AGAGTTGGACCCGACCCCAAT |
| 1635 RT- | TCCAAGACCACCCTCCTTTC  |
| 1635 RT+ | AGGCTCACAGTTACAGTTTA  |
| 2889 RT- | ATGATCTTGAGGGCAGACAG  |
| 2889 RT+ | GTTGAGGGAGAGAAGACCTT  |
| 3103 RT- | AGGATGGCAGGGGCAAAGGG  |
| 3103 RT+ | GGGAGATAAAGGAACATTGG  |
| 4780 RT- | AAACTTATAGTAAGGTTAAG  |
| 4780 RT+ | GTATGATGGAGATCATAAGG  |
